# Supplementary material for: Chemical looping steam reforming of glycerol for hydrogen production over NiO–Fe2O3/Al2O3 oxygen carriers
Source: Royal Society of Chemistry journal article supplement (doi:10.1039/d2ra04303c), 2022-01-01
Supplement: d2ra04303c1.pdf [file d2ra04303c1.pdf]

**Table 1 S**  $L_9(3^4)$  Factors and levels of the orthogonal tests

| Level Factor | Temperature<br>(A) | Water carbon<br>ratio(B) | Capacity (C) |
|--------------|--------------------|--------------------------|--------------|
| 1            | 600°C              | 1.0                      | 0            |
| 2            | 700°C              | 1.5                      | 2.5%         |
| 3            | 800°C              | 2.0                      | 5%           |

**Table 2 S** Orthogonal experimental protocol  $L_9(3^4)$

| Test number | Column number |      |      |   |
|-------------|---------------|------|------|---|
|             | 1(A)          | 2(B) | 3(C) | 4 |
| 1           | 1             | 1    | 1    | 1 |
| 2           | 1             | 2    | 3    | 2 |
| 3           | 1             | 3    | 2    | 3 |
| 4           | 2             | 1    | 2    | 3 |
| 5           | 2             | 2    | 1    | 1 |
| 6           | 2             | 3    | 3    | 2 |
| 7           | 3             | 1    | 3    | 2 |
| 8           | 3             | 2    | 2    | 3 |
| 9           | 3             | 3    | 1    | 1 |

**Table 3 S** Hydrogen selectivity extreme difference analysis

| Test<br>number | Column number |      |      |   | Experimental result        |
|----------------|---------------|------|------|---|----------------------------|
|                | 1(A)          | 2(B) | 3(C) | 4 | H <sub>2</sub> Selectivity |
| 1              | 1             | 1    | 1    | 1 | 85.33                      |
| 2              | 1             | 2    | 3    | 2 | 79.24                      |
| 3              | 1             | 3    | 2    | 3 | 83.01                      |
| 4              | 2             | 1    | 2    | 3 | 78.28                      |

|       |         |         |         |   |       |
|-------|---------|---------|---------|---|-------|
| 5     | 2       | 2       | 1       | 1 | 82.30 |
| 6     | 2       | 3       | 3       | 2 | 77.02 |
| 7     | 3       | 1       | 3       | 2 | 78.27 |
| 8     | 3       | 2       | 2       | 3 | 74.67 |
| 9     | 3       | 3       | 1       | 1 | 79.32 |
| $K_1$ | 246.941 | 241.874 | 247.573 |   |       |
| $K_2$ | 235.959 | 238.842 | 237.594 |   |       |
| $K_3$ | 234.521 | 239.349 | 232.254 |   |       |
| $k_1$ | 82.314  | 80.625  | 82.524  |   |       |
| $k_2$ | 78.653  | 79.614  | 79.198  |   |       |
| $k_3$ | 78.174  | 79.783  | 77.418  |   |       |
| $R_1$ | 4.14    | 1.011   | 5.106   |   |       |

**Table 4 S** Hydrogen content extreme difference analysis

| Test number | Column number |         |         |   | Experimental result      |
|-------------|---------------|---------|---------|---|--------------------------|
|             | 1(A)          | 2(B)    | 3(C)    | 4 | H <sub>2</sub> Content % |
| 1           | 1             | 1       | 1       | 1 | 78.405                   |
| 2           | 1             | 2       | 3       | 2 | 66.616                   |
| 3           | 1             | 3       | 2       | 3 | 67.167                   |
| 4           | 2             | 1       | 2       | 3 | 64.958                   |
| 5           | 2             | 2       | 1       | 1 | 63.065                   |
| 6           | 2             | 3       | 3       | 2 | 74.511                   |
| 7           | 3             | 1       | 3       | 2 | 56.353                   |
| 8           | 3             | 2       | 2       | 3 | 59.882                   |
| 9           | 3             | 3       | 1       | 1 | 62.728                   |
| $K_1$       | 212.188       | 199.716 | 212.798 |   |                          |
| $K_2$       | 203.119       | 189.563 | 194.302 |   |                          |

|       |         |         |         |
|-------|---------|---------|---------|
| $K_3$ | 178.963 | 204.406 | 186.585 |
| $k_1$ | 70.729  | 66.572  | 70.933  |
| $k_2$ | 67.706  | 63.188  | 64.767  |
| $k_3$ | 59.654  | 68.135  | 62.195  |
| $R_1$ | 11.075  | 4.947   | 8.738   |

**Table 5 S** Model Summary

|                      | R     | R <sup>2</sup> | Adjusted R <sup>2</sup> | Error in the standard estimates |
|----------------------|-------|----------------|-------------------------|---------------------------------|
| Hydrogen selectivity | 0.891 | 0.795          | 0.726                   | 1.71864                         |
| Hydrogen content     | 0.910 | 0.828          | 0.771                   | 3.29358                         |

**Table 6 S** Variance of hydrogen gas selectivity

|            | Quadratic sum | Free degree | Mean square | F      | Significance |
|------------|---------------|-------------|-------------|--------|--------------|
| Regression | 68.576        | 2           | 34.288      | 11.608 | 0.009        |
| Residual   | 17.722        | 6           | 2.954       |        |              |
| Total      | 86.298        | 8           |             |        |              |

**Table 7 S** Variance of hydrogen content

|            | Quadratic sum | Free degree | Mean square | F      | Significance |
|------------|---------------|-------------|-------------|--------|--------------|
| Regression | 313.866       | 2           | 156.933     | 14.467 | 0.005        |
| Residual   | 65.086        | 6           | 10.848      |        |              |
| Total      | 378.952       | 8           |             |        |              |

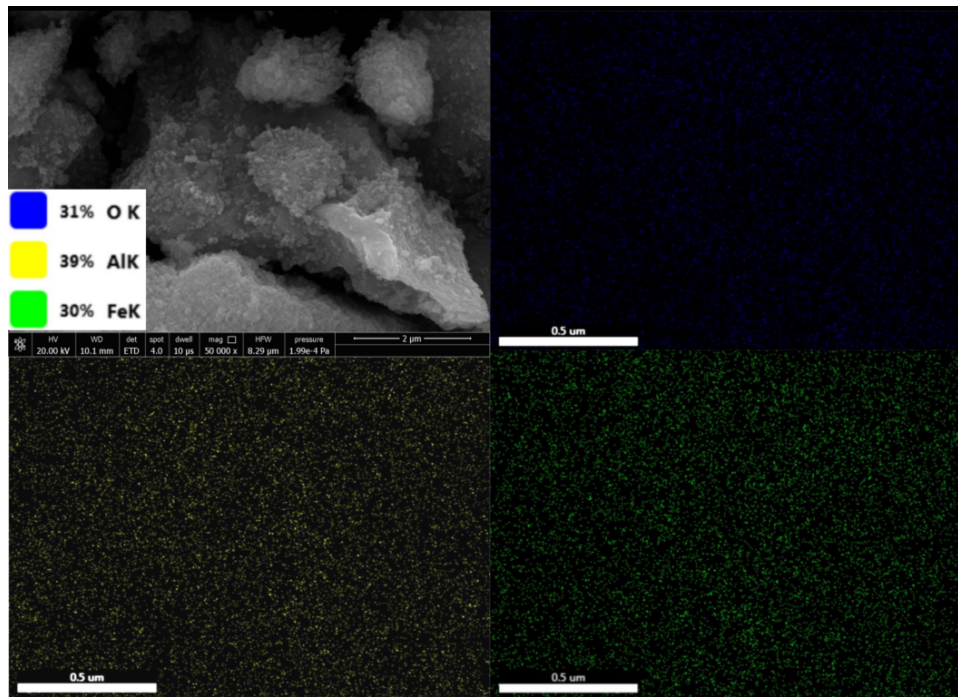

**Fig. 1 S.** SEM results of prepared Fe-Al OCs

**Fig. 2 S.** EDX micrographs of prepared Fe-Al OCs

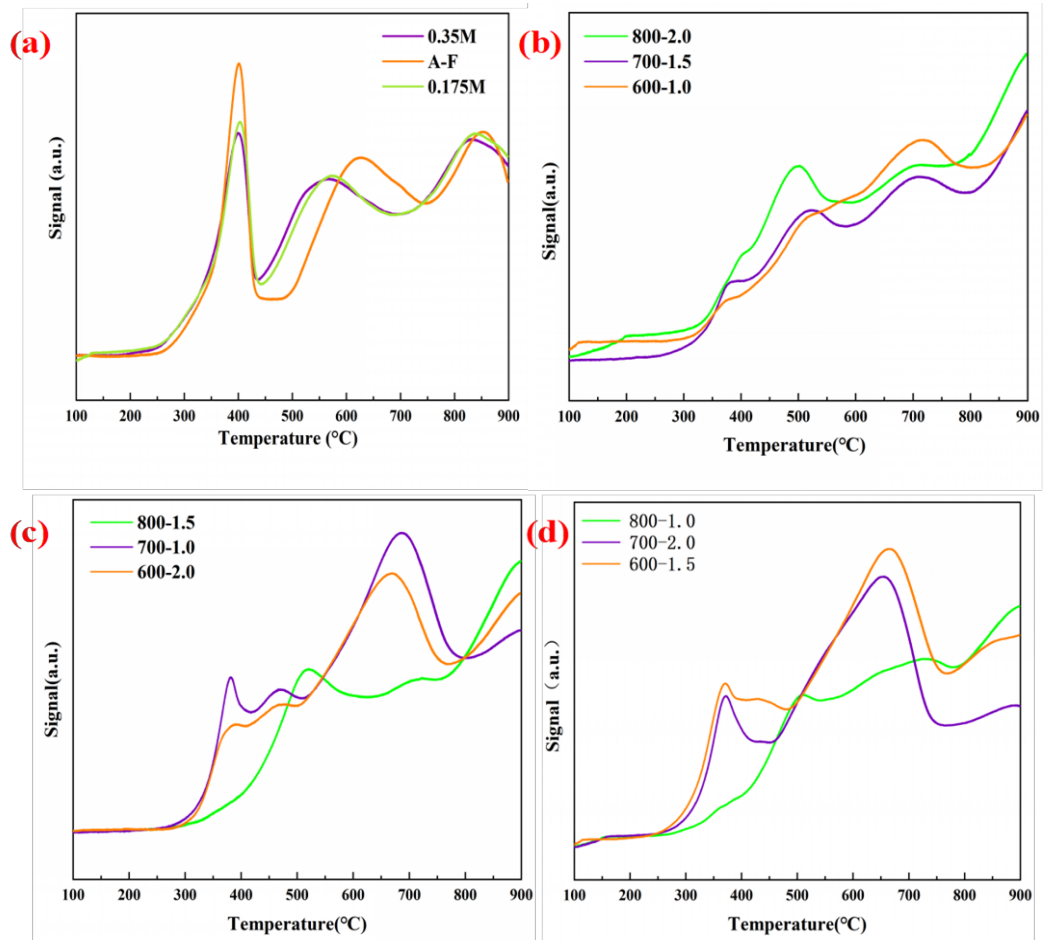

**Fig. 3 S.** H<sub>2</sub>-TPR patterns of (a) three fresh OCs; (b)After five cycles of OCs of 0 under different reaction conditions; (c)After five cycles of OCs capacity of 2.5% under different reaction conditions; (d)After five cycles of OCs capacity of 5% under different reaction conditions

**Fig. 4 S.** Orthogonal test effect graph (a) Optimum hydrogen content (b) Optimum hydrogen selectivity

**Fig. 5 S.** Gas content of glycerol reforming with different OCs in five cycles

**Fig. 5 S.** (continued).

Fig. 5 S. (continued).

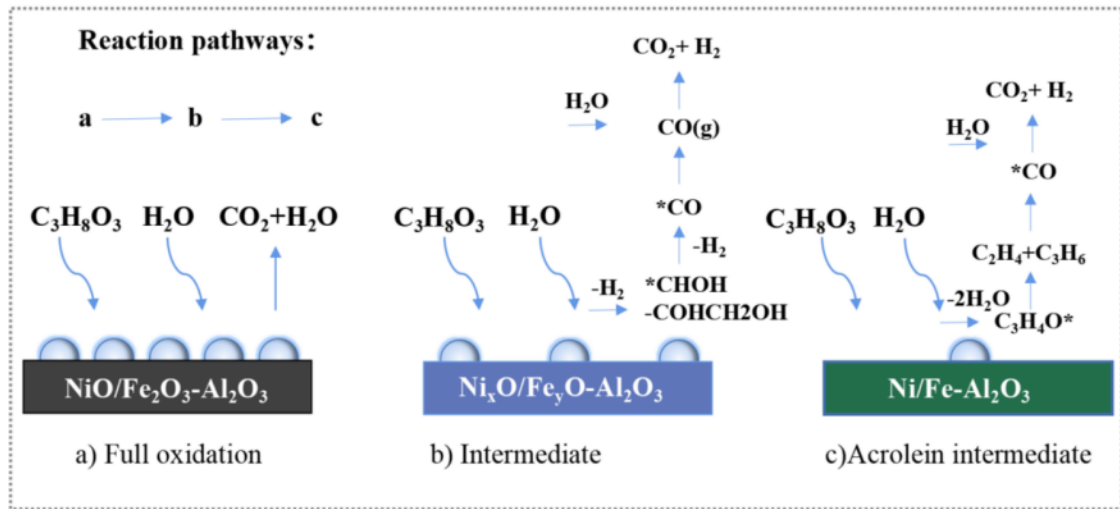

Fig. 6 S. Glycerol reaction pathway
